# Supplementary material for: Selecting and Assessing Underutilized Trees for Diverse Urban Forests: A Participatory Research Approach
Source: Frontiers journal article supplement (doi:10.3389/fevo.2022.759693), 2022-02-03
Supplement: Table_1.XLSX [file Table_1.XLSX]

## Sheet: S-1 Underutilized Tree Species
Table S-1
Species	Common Name	Plant Family	Florida Native	Mature Spread (ft.)	Mature Height (ft.)	Growth Rate	pH	Drought Tolerance**	Aerosol Salt Tolerance*	Root Salt Tolerance*	Wind Resistance**	Flood Tolerance**	Soil Area* (ft.)	Distance from Paved Surface (ft.)	Potential Pest Vulnerability	Hardiness
Acer negundo	boxelder	Sapinadacea	Y (North)	35-40'	40-50'	fast	acidic, alkaline	H	M	M	L	extended	n/a	n/a	M-H	3A-8B
Carpinus caroliniana	American hornbean, bluebeech, ironwood, musclewood	Betulaceae	Y	20-30'	20-30'	slow	acidic, slightly alkaline	M	L	n/a	n/a	occasional	3'x3'	n/a	L	3A-9A
Carya glabra	pignut hickory	Juglandaceae	Y	30-40'	50-65'	moderate	acidic, alkaline	H	M	none	M-H	occasional	30'x30'	10'	L-M	5A-9B
Castanea pumila	chinquapin, chinkapin, Alleghany chinkapin	Fagaceae	Y	n/a	7-25'	moderate	n/a	M	n/a	n/a	n/a	n/a	n/a	n/a	M	5-9
Cartrema americanum	wild olive, devilwood	Oleaceae	Y	10-15'	15-25'	moderate	acidic	M	H	none	n/a	extended	10'x10'	2'	L	5B-9B
Cedrus deodara	Deodar cedar	Pinaceae	N	30-40'	40-70'	moderate	acidic	H	n/a	n/a	L	none	> 6' wide	n/a	L	7A-9A
Ceiba speciosa	silk-floss tree	Bombaceae	N	40-55'	30-60'	fast	acidic, alkaline	H	L	L	n/a	n/a	large spaces	15'	L	9B-11
Celtis laevigata	sugarberry	Cannabaceae	Y	50-70'	50-70'	fast	acidic, alkaline	H	M-H	L	L-M	extended	30x30'	10'	L-M	5A-10B
Celtis occidentalis	common hackberry	Cannabaceae	Y	40-60'	40-70'	fast	acidic, alkaline	H	M	n/a	L-M	extended	> 6' lawn	10'	L	2-9B
Chionanthus retusus	Chinese fringetree	Oleaceae	N	10-15'	15-20'	slow	acidic, alkaline	M	n/a	n/a	n/a	n/a	n/a	4-6'	L	5B-9B
Chionanthus virginicus	white fringetree, fringetree, old-mans-beard	Oleaceae	Y	10-15'	12-20'	slow	acidic	M	none	n/a	n/a	n/a	n/a	4-6'	L-M	3A-9B
Conocarpus erectus	buttonwood	Combretaceae	Y	15-25'	20-40'	moderate	acidic, alkaline	H	H	H	M-H	extended	n/a	3-4'	L	10B-11
Eriobotrya japonica	loquat	Rosaceae	N	20-30'	30-35'	moderate	acidic, alkaline	M	M	M	n/a	none	n/a	n/a	M	8A-11
Feijoa sellowiana	feijoa	Myrtaceae	N	10-15'	10-15'	moderate	acidic, slightly alkaline	H	H	n/a	n/a	n/a	n/a	n/a	L	8A-11
Ilex cassine	dahoon holly	Aquifoliaceae	Y	8-12'	20-30'	moderate	acidic, slightly alkaline	M	M	L	H!	extended	10'x10'	2'	L	7A-11
Ilex opaca	American holly	Aquifoliaceae	Y	15-20'	35-50'	slow	acidic, slightly alkaline	H	H	M	H!	extended	20'x20'	6'	L-M	5B-9
Ilex vomitoria	Yaupon Holly	Aquifoliaceae	Y	15-20'	15-25'	moderate	acidic, alkaline	H	H	H	H!	extended	10'x10'	2'	L	7A-9B
Juniperus virginiana 'Brodie'	Brodie eastern redcedar	Cupressaceae	Y	10-20'	40-50'	fast	acidic, alkaline	H	H	n/a	L-M	n/a	n/a	3-4'	n/a	2A-9B
Liriodendron tulipifera	tuliptree, tulip-poplar, yellow-poplar	Magnoliaceae	Y	30-50'	80-100'	moderate	acidic	M	None	L	n/a	occasional	large spaces	n/a	M	5A-9A
Magnolia acuminata	cucumbertree	Magnoliaceae	Y	35-60	60-80	fast	acidic, slightly alkaline	M	n/a	n/a	n/a	n/a	large spaces	n/a	L	3B-8B
Magnolia virginiana	sweetbay magnolia	Magnoliaceae	Y	15-25'	40-50'	moderate	acidic	L	L	n/a	n/a	n/a	n/a	> 6'	L	5A-10A
Melaleuca viminalis	weeping bottle brush	Myrtaceae	N (EPPC II)	15-20'	20-30'	moderate	acidic, slightly alkaline	H	M	L	n/a	occasional	n/a	3-4'	L-M	9B-11
Morus rubra	red mulberry	Moraceae	Y	30-50'	50-75'	fast	acidic	n/a	none	none	L-M	occasional	30'x30'	10'	n/a	n/a
Nyssa aquatica	water tupelo	Nyssaceae	Y	25'-35'	75-100'	slow	acidic	L-M	n/a	n/a	M-H	extended	30'x30'	10'	L	6-9
Nyssa ogeche	Ogeechee tupelo, Ogeechee-lime	Nyssaceae	Y	25'-35'	35-45'	moderate	acidic	H	n/a	n/a	L-M	extended	n/a	> 6'	L	7A-9B
Nyssa sylvatica	blackgum, black tupelo, sourgum	Nyssaceae	Y	25'-35'	65-75'	slow	acidic	H	M	n/a	n/a	n/a	n/a	n/a	L	4B-9B
Ostrya virginiana	American hophornbeam, eastern hophornbeam	Betulaceae	Y	25-30'	30-40'	slow	acidic, alkaline	H	none	n/a	n/a	none	3'x3'; 10x'10'	3-4'	L	3A-9A
Pinus palustris	longleaf pine	Pinaceae	Y	30-40'	60-125'	fast	acidic, slightly alkaline	H	L-H	none	L-M	n/a	30'x30'	n/a	L-M	7A-10B
Piscidia piscipula	Florida fishpoison, Jamaican dogwood	Fabaceae	Y	30-50'	30-50'	fast	acidic, alkaline	H	H	H	n/a	n/a	n/a	n/a	n/a	11
Pithecellobium unguis-cati	cat’s claw , catclaw blackbead	Fabaceae	Y	10-25'	10-15'	moderate	alkaline	H	M	M	n/a	n/a	n/a	n/a	n/a	10A-11
Prunus angustifolia	Chickasaw plum	Rosaceae	Y	15-20'	12-20'	moderate	acidic	H	n/a	M	M-L	n/a	3'x3'; 10'x'10'	2'	L	6A-9B
Prunus umbellata	Flatwoods Plum	Rosaceae	Y	12-20'	12-20'	moderate	acidic, slightly alkaline	M	none	n/a	H!	n/a	3'x3'; 10'x'10'	2'	L	8A-9B
Quercus geminata	sand live oak	Fagaceae	Y	45-60'	30-50'	moderate	acidic, alkaline	H	H	H	H!	occasional	30'x30'	10'	n/a	n/a
Quercus incana	bluejack oak, scrub oak	Fagaceae	Y	45'	30-55'	n/a	acidic	H	n/a	n/a	n/a	n/a	n/a	n/a	n/a	7-9B?
Quercus michauxii	swamp chestnut oak, cow oak, basket oak	Fagaceae	Y	40-60'	60-100'	moderate	acidic	H	n/a	n/a	n/a	occasional	large spaces	n/a	L-M	5-9B
Quercus muehlenbergii	chinkapin oak, chinquapin oak, chestnut oak	Fagaceae	Y	50-60'	50-80'	moderate	acidic, alkaline	H	M	n/a	n/a	n/a	large spaces	n/a	L	3A-8B
Rhus copallinum	winged sumac, shining sumac	Anacardiaceae	Y	12-18'	12-18'	moderate	acidic, slightly alkaline	H	n/a	n/a	n/a	n/a	n/a	n/a	L	5A-10B
Sambucus nigra subsp. canadensis	American elderberry, common elderberry	Adoxaceae	Y	6-10'	8-12'	moderate	acidic, alkaline	L-M	L	n/a	L-M	extended	10'x10'	2'	L	4A-10B
Sapindus saponaria	Florida soapberry, wingleaf soapberry	Sapinadacea	Y	25-35'	30-40'	moderate	acidic, alkaline	H	H	H	n/a	n/a	n/a	4-6'	L	10A-11
Sassafras albidum	sassafras	Lauraceae	Y	25-40'	30-60'	moderate	acidic	H	n/a	n/a	n/a	n/a	n/a	4-6'	M-H	5A-9A
Taxodium ascendens	pondcypress	Cupressaceae	Y	10-15'	50-60'	fast	acidic, slightly alkaline	H	M	none	H!	extended	30'x30'	3'-4'; 10'	L	5B-9B
Taxodium distichum	baldcypress	Cupressaceae	Y	25-35'	60-80'	fast	acidic, slightly alkaline	H	M	none	H!	extended	30'x30'	10'	L	5A-10B
Ulmus alata	Winged Elm	Ulmaceae	Y	30-40'	45-70'	fast	acidic, alkaline	M-H	M	none	M	extended	30'x30'	10'	L-M	6A-9B
Ulmus americana 'libertas'	Liberty Elm	Ulmaceae	Y	50-70'	70-90'	fast	acidic, alkaline	M-H	M	L	L-M	extended	30'x30'	10'	L-M	2A-9B
Ulmus parvifolia 'Emer II'	ALLEE elm	Ulmaceae	N	35-50'	40-60'	moderate	acidic, alkaline	H	M	n/a	n/a	n/a	10'x10'	3-4'	L	5B-10A
Vaccinium arboreum	sparkleberry, farkleberry	Ericaceae	Y	4-15'	6-25'	moderate	acidic	M	n/a	n/a	H	occasional	n/a	n/a	L	6B-10B
Viburnum obovatum	blackhaw, Walter's viburnum	Adoxaceae	Y	6-10'	8-25'	moderate	acidic, alkaline	H	n/a	L	n/a	occasional	10'x10'	2'	L	7-10
Viburnum rufidulum	rusty blackhaw, Southern blackhaw	Adoxaceae	Y	20-25'	20-25'	slow	acidic, alkaline	H	none	n/a	n/a	occasional	10'x10'	2'	L	5B-9B

## Sheet: S-2 Practitioner Notes
Table S-2
Species	Common Name	Practitioner Notes	Literature Notes	Reason for Exclusion
Acer negundo	boxelder	Some find it can grow in zone 9B. "…pretty good promise as a shade tree in a wider ROW." "We know that this works but is still underutilized."	Quick growth, weak wood, decay, and several pests. Plant in group with more long-lived trees.	Low wind resistance. Pest issues. May not tolerate warmer climate trends.
Carpinus caroliniana	American hornbean, bluebeech, ironwood, musclewood	Better in group plantings. "We know that this works but is still underutilized. Not very attractive." "...may be a nice addition in places where a small grouping can be planted – strong wood."	Canker could be an issue in humid environments.	May not tolerate warmer climate trends.
Cartrema americanum	wild olive, devilwood	n/a	Fruit can be a problem. Turns yellow in fall.	Prefers acidic, moist soils.
Carya glabra	pignut hickory	n/a	Spreads through rhizomes. Nuts edible to humans. moderateerately resistant to chestnut blight, but other diseases could be issue.	Messy fruit.
Castanea pumila	chinquapin, chinkapin, Alleghany chinkapin	"Never tried this." "...finding it in the nursery industry will prove a challenge." "Species performed well in an urban streetscape [Tampa] however became very large. Beautiful tree."	No proven urban tolerance. Best in wet soils. Cartrema floridanum is a less common central Florida native.	Moderate drought tolerance. May not tolerate warmer climate trends.
Cedrus deodara	Deodar cedar	"weak root system, blows over in wind storms." "…they would blow over even when planted in a wooded situation."	Andy K. says low wind tolerance. Apparently sensitive to smog.	Weak root system/not wind resistant. May not tolerate warmer climate trends.
Ceiba speciosa	silk-floss tree	"We know that this works but is still underutilized." "This is best kept at arms' length as the coating of prickles make caution a requisite. The other visual cognate Ceiba aesculifolia generally has fewer prickles. Both have great flowers, but both are freeze sensitive."	Monsa' lacks trunk prickles. Showy. Can form large surface roots.	Best for park or lawn setting; cold sensitive.
Celtis laevigata	sugarberry	"We know that this works but is still underutilized." "This and its cousin below need to be trialed – they get large, have interesting botanical characteristics and seem to be well adapted to our winds." "Great native tree and excellent source of food for birds (fruit) – I have many of them growing in my home in Citrus County – can be messy and would not recommend for a street tree."	Poor CODIT, so avoid mechanical injury. Messy fruit, but small. Doesn't do well in highly-alkalinealine soils.	SELECTED
Celtis occidentalis	common hackberry	"need a good source"	Tolerates alkalinealine soils better than C. laevigata and has been used as street tree in Texas. Poor CODIT, so avoid mechanical injury.	Availability.
Chionanthus retusus	Chinese fringetree	"very showy, recommend trying more sites"	Showy.	Not sure of wind resistance.
Chionanthus virginicus	white fringetree, fringetree, old-mans-beard	"a showy little native that performs well in a shaded site."	Showy. Females have fruit. Chionanthus pygmaeus (pygmy fringetree) is native to central Florida and is endangered.	Prefers acidic soils.
Conocarpus erectus	buttonwood	"Testing some now as a street tree. So far it is doing well."	Sooty mold. Conocarpus erectus var. sericeus has silver foliage. Tough coastal tree.	May be too cold sensitive for inland sites.
Eriobotrya japonica	loquat	"We know that this works but is still underutilized." "We have some in our ROW. They grow well, frost hardy, don't get really tall (15-25'), but do tend to sprawl a bit. May need pruning to keep within confines of site."	Urban tolerant, but not long-lived. Different cultivars available.	Messy fruit.
Feijoa sellowiana	feijoa	"We know that this works but is still underutilized."	Fruit can be a problem.	Messy fruit.
Ilex cassine	dahoon holly	n/a	Needs irrigation in dry area. Need male and female trees for berries.	Needs irrigation during dry spells.
Ilex opaca	American holly	n/a	Vulnerable to pests if nutrient deficient. Need male and female trees for berries. Many cultivars.	May not tolerate warmer climate trends.
Ilex vomitoria	Yaupon Holly	"We know that this works but is still underutilized."	Cultivars can be useful. Sprouts from roots when disturbed.	SELECTED
Juniperus virginiana 'Brodie'	'Brodie' eastern redcedar	n/a	Columnar variety. Attracts birds. Tough tree.	Price.
Liriodendron tulipifera	tuliptree, tulip-poplar, yellow-poplar	"We know that this works but is still underutilized." "Used this a little, like it. Need more use."	Susceptible to verticillum wilt and aphids.	Not as wind tolerant. May not tolerate warmer climate trends.
Magnolia acuminata	cucumbertree	"Threatened, found in panhandle. I heard of an “Opal Beach” variety which reportedly has salt tolerance. Check with Mike Marshall of Marshall tree farm…"	Look into 'Opal beach' cultivar	May not tolerate warmer climate trends.
Magnolia virginiana	sweetbay magnolia	n/a	Good for narrow alleys or next to buildings because of narrow form.	Not as drought tolerant as others.
Melaleuca viminalis	weeping bottle brush	"We know that this works but is still underutilized."	Witches broom, mites, and other issues in wet soil.	Potential to become invasive in warmer areas.
Morus rubra	red mulberry	"We know that this works but is still underutilized." "Just not over parking lots."	Male tree produces allergens. Messy fruit.	Fruit too messy.
Nyssa aquatica	water tupelo	"We know that this works but is still underutilized."	Male tree produces allergens. Forms buttresses and swollen trunk base in swamp setting.	Availability. May not tolerate warmer climate trends.
Nyssa ogeche	Ogeechee tupelo, Ogeechee-lime	"Need a source." "Never seen as a street tree -- might be interesting."	Messy, so choose male.	Availability.
Nyssa sylvatica	blackgum, black tupelo, sourgum	Never seen as a street tree -- might be interesting.	Some pests. Used as street tree up north. Fruit can be nuisance. Nice fall foliage. Similar to N. bicolor.	Availability.
Ostrya virginiana	American hophornbeam, eastern hophornbeam	Might have a nice shape open grown, might be too much exposure?	Yellow fall color. Tough tree should do well in urban areas with good soil drainage.	Availability. May not tolerate warmer climate trends.
Pinus palustris	longleaf pine	"We know that this works but is still underutilized." "Agreed – sap drip can be a complaint…"	Could be used more often in place of P. elliottii.	Too common based on inventories.
Piscidia piscipula	Florida fishpoison, Jamaican dogwood	n/a	Very underutilized. Wood is very resistant to decay. All parts of trees poisonous if ingested. Larval host for several butterflies.	May be too cold sensitive for inland sites.
Pithecellobium unguis-cati	cat’s claw, catclaw blackbead	n/a	Thorns. Butterfly host.	May be too cold sensitive for inland sites.
Prunus angustifolia	Chickasaw plum	"We know that this works but is still underutilized."	Thorns. Fleshy fruit. Root suckers require pruning.	Not as wind tolerant. Fruit and thorns issue with final planting sites.
Prunus umbellata	Flatwoods Plum	"We know that this works but is still underutilized." "Another 'nice in the spring then disappearing into the background' little tree."	Thorns. Good for under powerlines. Fleshy fruit. Requires some structural pruning.	This was a runner up, but fruit and thorns issue with final planting sites. Availability an issue, too.
Quercus geminata	sand live oak	"We know that this works but is still underutilized." "I think a lot of Q. virginiana sold may be Q. geminata, we have many large ones along streets."	High allergin producer.	Price.
Quercus incana	bluejack oak, scrub oak	n/a	Can be trained to remain smaller stature than Q. virginiana and other common urban oaks. High allergin producer. Not much horticultural information.	Not sure of tolerance to warmer, subtropical climate. Availability.
Quercus michauxii	swamp chestnut oak, cow oak, basket oak	n/a	Big acorns. Irrigation needed in 9B+. Similar to the more upland Q. prinus.	Needs irrigation during dry spells.
Quercus muehlenbergii	chinkapin oak, chinquapin oak, chestnut oak	n/a	Adaptable.	May not tolerate warmer climate trends.
Rhus copallinum	winged sumac, shining sumac	"Never considered this in this capacity, but why not try it."	Sends underground runners, so better for informal landscapes. Fall color.	Habit not ideal for street sites.
Sambucus nigra subsp. canadensis	American elderberry, common elderberry	n/a	Suckers easily, but can be trained as specimen tree. Fruit can be nuisance.	Suckers easily. Weak wood.
Sapindus saponaria	Florida soapberry, wingleaf soapberry	n/a	Poisonous seeds. Bushy habit looks best with understory shrubs and ground covers. Fruit can be nuisance.	May be too cold sensitive for inland sites.
Sassafras albidum	sassafras	"not much success with this one" "Might be good at the end of a park area, in a grouping, tend to be brittle I think."	Laurel wilt disease. No proven urban tolerance. Showy fruit can be a nuisance.	Laurel wilt disease. May not tolerate warmer climate trends.
Taxodium ascendens	pondcypress	"Tried and not very attractive. Ok in large groupings."	More drought tolerant. Anecdotally doesn't form many knees in urban areas. Low maintenance. Doesn't tolerate pH above 7.5 well.	SELECTED
Taxodium distichum	baldcypress	"We know that this works but is still underutilized." "...planted them as parking lot island trees with good results." "Planted in a streetscape in downtown Tampa, doing very well."	Anecdotally doesn't form many knees in urban areas. Used as street tree in many Southern cities. Doesn't tolerate pH above 7.5 well. Several cultivars exist.	Too common based on inventories.
Ulmus alata	winged elm	"We know that this works but is still underutilized." "Love this tree..."	DED not an issue in Central FL. Grows well in urban areas, but requires lots of early structural pruning.	SELECTED
Ulmus americana 'libertas'	Liberty Elm	"We have some that are doing well. No Dutch Elm disease made it to Central Florida."	DED not an issue in Central FL, but can be susceptible. Several other pests and diseases.	Availability.
Ulmus parvifolia 'Emer II'	ALLEE elm	n/a	Excellent pest and disease resistance. Form resembles U. americana.	Good option, but decided to try the native elm.
Vaccinium arboreum	sparkleberry, farkleberry	n/a	Attracts bees and other pollinators (a positive and negative). Very underutilized.	Not as tolerant of drought and alkaline soils.
Viburnum obovatum	blackhaw, Walter's viburnum	"We know that this works but is still underutilized."	Can be trained to be multi-trunked small tree.	SELECTED
Viburnum rufidulum	rusty blackhaw, Southern blackhaw	n/a	Fall color. Good for beneath powerlines and other tight spaces. Root suckers can form and require pruning.	Availability.

## Sheet: Captions
Table S-1. List of 48 underutilized tree species and their growth requirements and characteristics, as well as tolerances to different environmental conditions. This list was developed by the Central Florida Urban Forest Diversity Working Group in 2017 using a participatory research approach which included input from practitioners and researchers in the Working Group. Five of the 48 potential spe…
Table S-2. List of 48 underutilized tree species developed and annotated by the Central Florida Urban Forest Diversity Working Group in 2017 using a participatory research approach which included input from practitioners and researchers in the Working Group. “Practitioner Notes” refers to comments on species that were made by working group members, while “Literature Notes” refers to notes assembl…

## Sheet: Sources
Sources
Nomenclature
Wunderlin, R. P., B. F. Hansen, A. R. Franck, and F. B. Essig. 2021. Atlas of Florida Plants (http://florida.plantatlas.usf.edu/). [S. M. Landry and K. N. Campbell (application development), USF Water Institute.] Institute for Systematic Botany, University of South Florida, Tampa.
Nativity and invasive potential
Florida Invasive Species Council (FISC). 2021. List of Invasive Plant Species (https://floridainvasivespecies.org/priorplantlist.cfm )
University of Florida IFAS, Center for Aquatic and Invasive Species. Plant Directory (https://plants.ifas.ufl.edu/plant-directory/)
Tree traits and literature notes
University of Florida IFAS, Environmental Horticulture Department Tree Fact Sheets (https://hort.ifas.ufl.edu/database/trees/trees_common.shtml)
Dirr MA. 2002. Dirr’s Trees and Shrubs for Warm Climates: An Illsutrated Encyclopedia. 1st edition. Portland (OR, USA): Timber Press, Inc. 446 p.
Dirr MA. 2011. Dirr’s encyclopedia of trees and shrubs. 1st edition. Portland (OR, USA): Timber Press, Inc. 951 p.
USDA, NRCS. 2021. PLANTS Database National Plant Data Team, Greensboro, NC 27401-4901 USA. https://plants.sc.egov.usda.gov/.
USDA Agricultural Research Service. 2012. USDA Plant Hardiness Zone Map (https://planthardiness.ars.usda.gov/)
Potential pest vulnerability
University of Florida IFAS, School of Forest Resources and Conservation Forest Health Extension (http://sfrc.ufl.edu/extension/forest_health/)
Florida Department of Agriculture and Consumer Services. Florida Forest Service Forest Health Page. (https://www.freshfromflorida.com/Divisions-Offices/Florida-Forest-Service/Our-Forests/Forest-Health)
